# Supplementary material for: Parasitic infections during pregnancy need not affect infant antibody responses to early vaccination against Streptococcus pneumoniae, diphtheria, or Haemophilus influenzae type B
Source: PubMed Central journal article supplement (PMC6413956; doi:10.1371/journal.pntd.0007172), 2019-02-28

*S. pneumoniae* 14 IgG by hookworm infection status

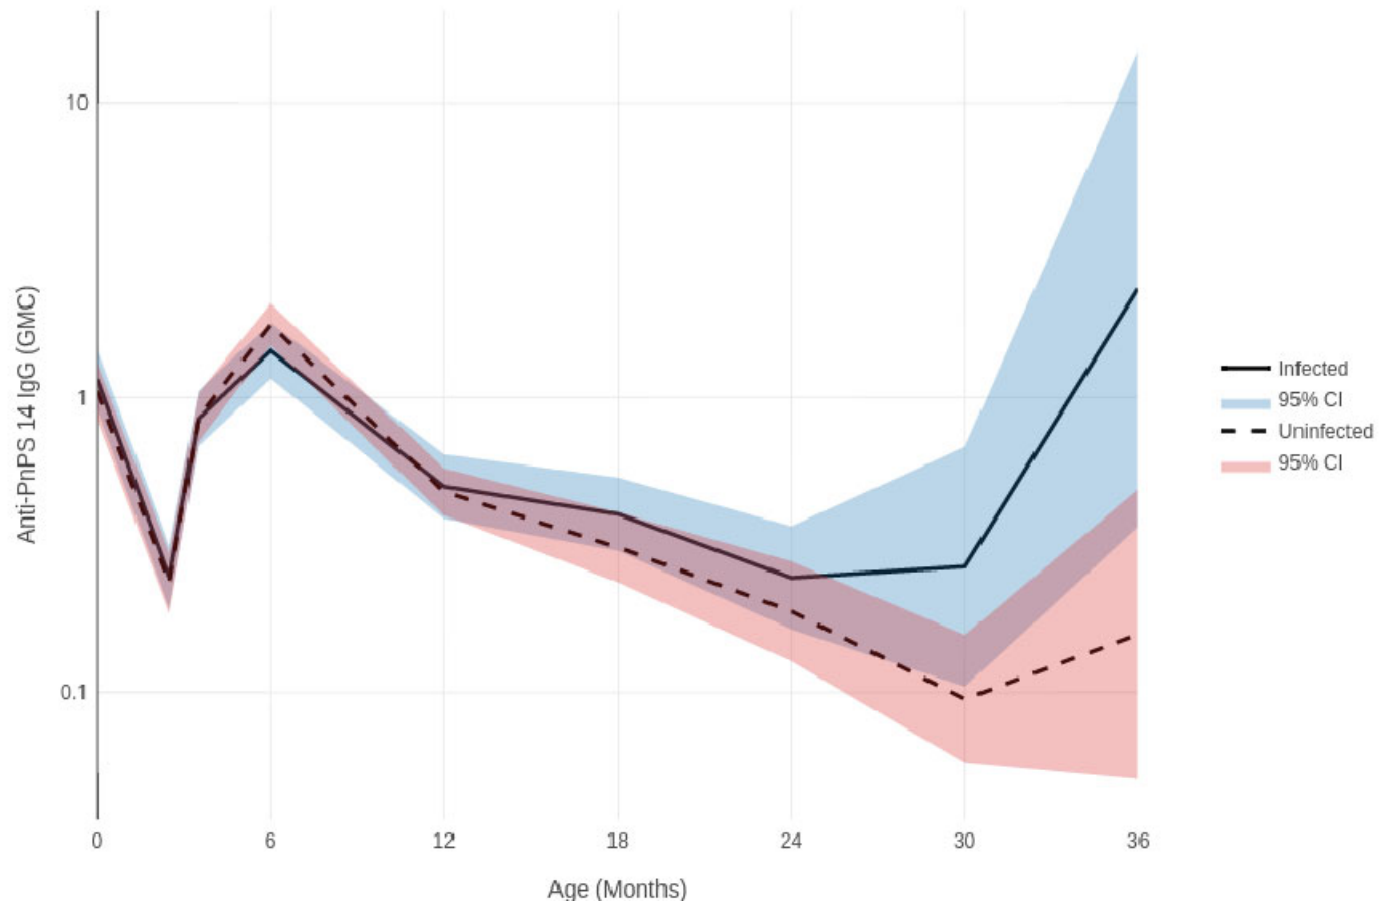

Supplement: pntd.0007172.s002.pdf [file pntd.0007172.s002.pdf]
