# Supplementary material for: Parasitic infections during pregnancy need not affect infant antibody responses to early vaccination against Streptococcus pneumoniae, diphtheria, or Haemophilus influenzae type B
Source: PubMed Central journal article supplement (PMC6413956; doi:10.1371/journal.pntd.0007172), 2019-02-28

(a) *S. pneumoniae* 14 IgG by STH infection status

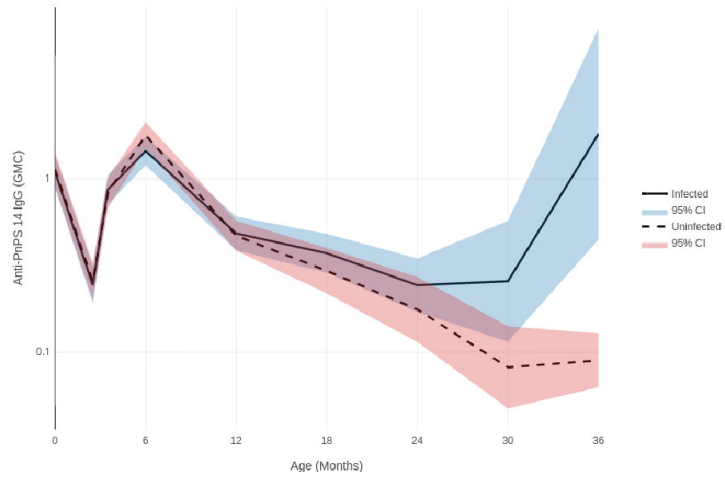

(b) *S. pneumoniae* 18C IgG by STH infection status

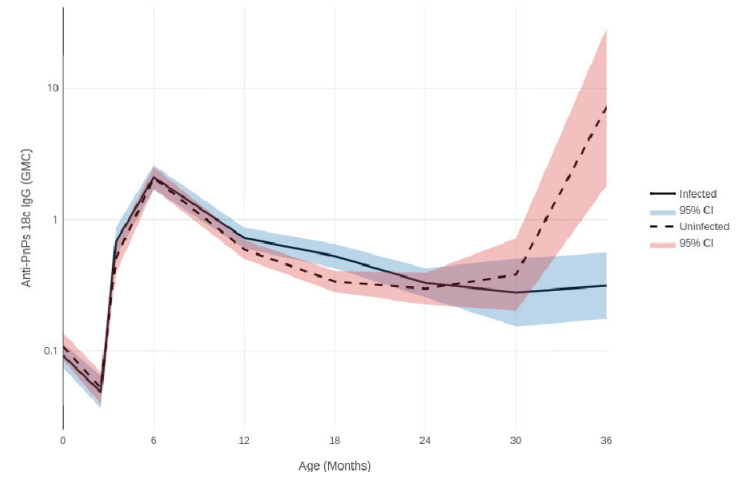

(c) *S. pneumoniae* 19F IgG by STH infection status

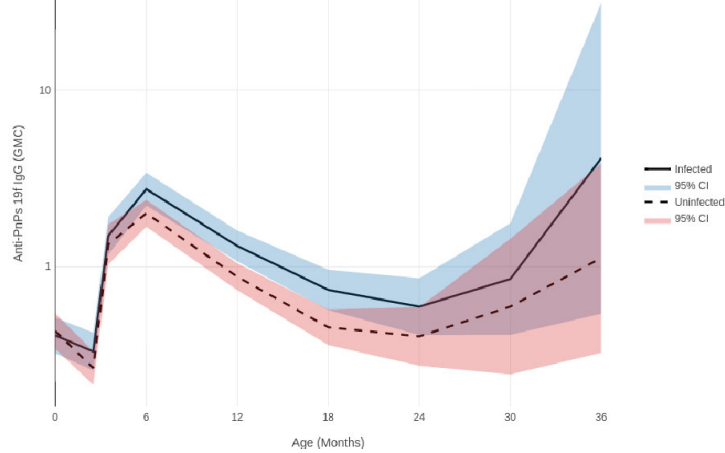

(d) Diphtheria CRM IgG by STH infection status

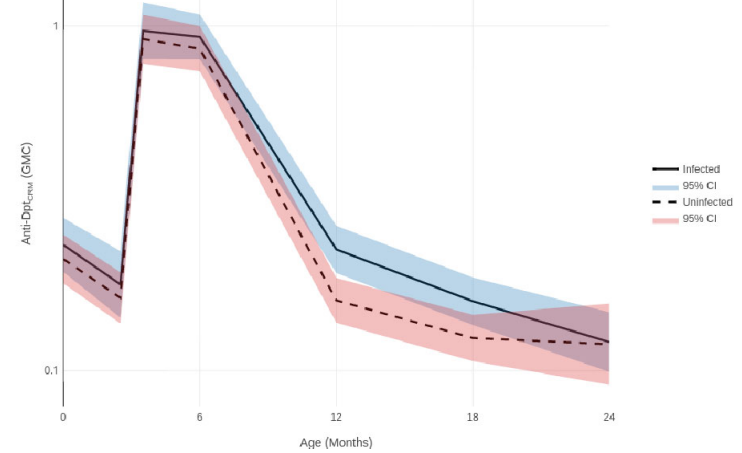

Supplement: pntd.0007172.s005.pdf [file pntd.0007172.s005.pdf]
